# Supplementary material for: The Role of the Major Histocompatibility Complex Region in Cognition and Brain Structure: A Schizophrenia GWAS Follow-Up
Source: Atypon-hosted journal article supplement (doi:10.1176/appi.ajp.2013.12020226), 2013-08-01
Supplement: 877_ds001.pdf [file 877_ds001.pdf]

**Table S1. rs12807809 association with cognitive measures**

| NRGN-rs12807809            |                       |          |      |              |              |              |                        |                             |       |
|----------------------------|-----------------------|----------|------|--------------|--------------|--------------|------------------------|-----------------------------|-------|
| Cognitive function         | Test or Subscale      | sample   | n    | Mean (SD)    | Mean (SD)    | Mean (SD)    | Regression Coefficient | 95% Confidence Interval     | p     |
|                            |                       |          |      | CC           | CT           | TT           | B                      | of B regression coefficient |       |
| <b>Current IQ</b>          | Full Scale IQ         | cases    | 329  | 102.8 (15.4) | 98.6 (18.4)  | 100.1 (18.4) | (-)1.03                | (-)2.103-0.043              | 0.06  |
|                            |                       | controls | 2243 | 109.8 (14.2) | 112.8 (14.2) | 113.6 (14.6) |                        |                             |       |
| <b>Working Memory</b>      | WAIS Digit Span       | cases    | 329  | 13.5 (3.0)   | 13.4 (3.6)   | 13.6 (3.7)   | (-)0.104               | (-)0.382-0.173              | 0.46  |
|                            |                       | controls | 2243 | 13.7 (4.1)   | 14.3 (3.8)   | 14.3 (3.9)   |                        |                             |       |
|                            | WMS Spatial Span      | cases    | 234  | 16.2 (3.8)   | 14.9 (3.4)   | 15.2 (3.2)   | (-)0.064               | (-)0.539-0.411              | 0.791 |
|                            |                       | controls | 395  | 16.8 (3.7)   | 17.3 (3.5)   | 17.2 (3.3)   |                        |                             |       |
| <b>Episodic Memory</b>     | WMS Logical Memory I  | cases    | 235  | 25.6 (11.1)  | 23.8 (8.3)   | 24.7 (8.9)   | 0.309                  | (-)0.759-1.377              | 0.57  |
|                            |                       | controls | 396  | 27.9 (7.9)   | 31.9 (6.4)   | 30.2 (6.5)   |                        |                             |       |
|                            | WMS Logical Memory II | cases    | 235  | 29.4 (9.6)   | 26.4 (10.1)  | 27.1 (10.4)  | (-)0.276               | (-)1.492-0.940              | 0.656 |
|                            |                       | controls | 396  | 31.3 (7.8)   | 34.7 (7.6)   | 34.4 (7.1)   |                        |                             |       |
| <b>Attention/Vigilance</b> | CPT (3,7 version)     | cases    | 332  | 4.35 (0.59)  | 4.14 (0.99)  | 4.18 (0.88)  | 0.003                  | (-)0.089-0.095              | 0.95  |
|                            |                       | controls | 507  | 4.79 (0.46)  | 4.76 (0.57)  | 4.75 (0.58)  |                        |                             |       |

**Schizophrenia Risk Allele='T'=major allele**

Positive Regression co-efficient indicates Sz risk allele associated with worse performance on cognitive test

Table S2. rs9960767 association with cognitive measures

TCF4- rs9960767

| Cognitive function         | Test or Subscale      | sample   | n    | Mean (SD)    | Mean (SD)    | Mean (SD)   | Regression Coefficient | 95% CI of B regression coefficient | p     |
|----------------------------|-----------------------|----------|------|--------------|--------------|-------------|------------------------|------------------------------------|-------|
|                            |                       |          |      | AA           | AC           | CC          |                        |                                    |       |
| <b>Current IQ</b>          | Full Scale IQ         | cases    | 327  | 99.4 (18.2)  | 102.7 (18.6) | 93.3 (7.8)  | 0.537                  | (-)1.247-2.322                     | 0.555 |
|                            |                       | controls | 2193 | 113.2 (14.4) | 113.3 (14.5) | 142 (n/a)   |                        |                                    |       |
| <b>Working Memory</b>      | WAIS Digit Span       | cases    | 327  | 13.6 (3.8)   | 13.7 (2.9)   | 12.0 (5.2)  | 0.405                  | (-)0.056-0.866                     | 0.085 |
|                            |                       | controls | 2193 | 14.2 (3.8)   | 14.7 (4.0)   | 21.0 (n/a)  |                        |                                    |       |
|                            | WMS Spatial Span      | cases    | 228  | 15.1 (3.2)   | 15.3 (3.5)   | 18.5 (2.1)  | (-)0.100               | (-)0.852-0.652                     | 0.794 |
|                            |                       | controls | 384  | 17.3 (3.4)   | 16.7 (3.7)   | n/a         |                        |                                    |       |
| <b>Episodic Memory</b>     | WMS Logical Memory I  | cases    | 229  | 24.2 (8.6)   | 25.6 (8.8)   | 27.5 (17.7) | (-)0.201               | (-)1.877-1.474                     | 0.814 |
|                            |                       | controls | 385  | 31.0 (6.6)   | 29.6 (6.4)   | n/a         |                        |                                    |       |
|                            | WMS Logical Memory II | cases    | 229  | 26.7 (10.4)  | 28.9 (9.4)   | 24.0 (14.1) | 0.177                  | (-)1.739-2.092                     | 0.856 |
|                            |                       | controls | 385  | 34.5 (7.2)   | 33.8 (8.0)   | n/a         |                        |                                    |       |
| <b>Attention/Vigilance</b> | CPT (3-7 version)     | cases    | 330  | 4.17 (0.90)  | 4.18 (0.95)  | 3.64 (0.91) | (-)0.127               | (-)0.265-0.012                     | 0.073 |
|                            |                       | controls | 501  | 4.78 (0.56)  | 4.61 (0.66)  | n/a         |                        |                                    |       |

**Schizophrenia Risk Allele='C'=minor allele**

Positive Regression co-efficient indicates Sz risk allele associated with worse performance on cognitive test

**Table S3. rs6932590 association with cognitive measures**

**MHC-rs6932590**

| Cognitive function         | Test or Subscale      | sample   | n    | Mean (SD)    | Mean (SD)    | Mean (SD)    | Regression Coefficient | 95% CI of B regression coefficient | p     |
|----------------------------|-----------------------|----------|------|--------------|--------------|--------------|------------------------|------------------------------------|-------|
|                            |                       |          |      | CC           | CT           | TT           |                        |                                    |       |
| <b>Current IQ</b>          | Full Scale IQ         | cases    | 336  | 102.0 (18.7) | 98.6 (18.3)  | 100.1 (18.2) | 0.909                  | (-)0.022-1.839                     | 0.056 |
|                            |                       | controls | 2217 | 113.4 (14.4) | 114.3 (15.1) | 112.7 (14.1) |                        |                                    |       |
| <b>Working Memory</b>      | WAIS Digit Span       | cases    | 336  | 14.2 (4.5)   | 13.6 (3.7)   | 13.6 (3.7)   | 0.131                  | (-)0.108-0.370                     | 0.284 |
|                            |                       | controls | 2217 | 14.3 (3.8)   | 14.4 (3.9)   | 14.2 (3.8)   |                        |                                    |       |
|                            | WMS Spatial Span      | cases    | 235  | 15.9 (3.6)   | 15.5 (3.2)   | 14.8 (3.3)   | 0.362                  | (-) 0.045-0.768                    | 0.081 |
|                            |                       | controls | 395  | 17.6 (3.6)   | 17.2 (3.3)   | 17.1 (3.4)   |                        |                                    |       |
| <b>Episodic Memory</b>     | WMS Logical Memory I  | cases    | 236  | 25.4 (7.9)   | 23.9 (8.7)   | 24.6 (8.9)   | (-)0.335               | (-)1.252-0.582                     | 0.473 |
|                            |                       | controls | 396  | 29.9 (7.2)   | 30.8 (6.7)   | 30.9 (6.4)   |                        |                                    |       |
|                            | WMS Logical Memory II | cases    | 236  | 26.4 (10.9)  | 26.8 (10.7)  | 27.0 (10.0)  | 0.002                  | (-)1.043-1.047                     | 0.997 |
|                            |                       | controls | 396  | 33.9 (8.9)   | 34.8 (6.6)   | 34.2 (7.4)   |                        |                                    |       |
| <b>Attention/Vigilance</b> | CPT (3,7 version)     | cases    | 340  | 4.17 (0.98)  | 4.21 (0.88)  | 4.13 (0.94)  | 0.077                  | (-)0.001-0.155                     | 0.053 |
|                            |                       | controls | 511  | 4.93 (0.49)  | 4.79 (0.58)  | 4.72 (0.58)  |                        |                                    |       |

**Schizophrenia Risk Allele='T'=major allele**

Positive Regression co-efficient indicates Sz risk allele associated with worse performance on cognitive test

**Table S4. rs3131296 association with cognitive measures**

**MHC-rs3131296**

| Cognitive function         | Test or Subscale      | sample   | n    | Mean (SD)    | Mean (SD)    | Mean (SD)    | Regression Coefficient | 95% CI of B regression coefficient | p     |
|----------------------------|-----------------------|----------|------|--------------|--------------|--------------|------------------------|------------------------------------|-------|
|                            |                       |          |      | AA           | AG           | GG           |                        |                                    |       |
| <b>Current IQ</b>          | Full Scale IQ         | cases    | 336  | 101.0 (n/a)  | 101.3 (18.4) | 99.3 (18.2)  | (-)0.107               | (-)1.351-1.137                     | 0.866 |
|                            |                       | controls | 2239 | 109.5 (11.3) | 113.6 (14.6) | 113.3 (14.5) |                        |                                    |       |
| <b>Working Memory</b>      | WAIS Digit Span       | cases    | 336  | 15.0 (n/a)   | 13.7 (4.1)   | 13.6 (3.6)   | (-)0.044               | (-)0.363-0.277                     | 0.79  |
|                            |                       | controls | 2239 | 13.7 (3.8)   | 14.3 (3.9)   | 14.3 (3.8)   |                        |                                    |       |
|                            | WMS Spatial Span      | cases    | 235  | -            | 14.4 (3.1)   | 15.3 (3.3)   | (-)0.369               | (-)0.956-0.219                     | 0.219 |
|                            |                       | controls | 395  | 17.8 (2.5)   | 17.2 (3.1)   | 17.2 (3.4)   |                        |                                    |       |
| <b>Episodic Memory</b>     | WMS Logical Memory I  | cases    | 236  | -            | 24.6 (8.5)   | 24.4 (8.8)   | 0.563                  | (-)0.759-1.885                     | 0.403 |
|                            |                       | controls | 397  | 29.8 (3.9)   | 31.4 (6.7)   | 30.6 (6.6)   |                        |                                    |       |
|                            | WMS Logical Memory II | cases    | 236  | -            | 27.2 (11.3)  | 26.8 (10.0)  | 0.615                  | (-)0.891-2.121                     | 0.423 |
|                            |                       | controls | 397  | 33.3 (7.7)   | 34.9 (7.5)   | 34.3 (7.2)   |                        |                                    |       |
| <b>Attention/Vigilance</b> | CPT (3,7 version)     | cases    | 340  | 4.67 (n/a)   | 4.34 (0.85)  | 4.12 (0.93)  | 0.107                  | (-)0.007-0.221                     | 0.067 |
|                            |                       | controls | 513  | 4.88 (0.58)  | 4.79 (0.53)  | 4.75 (0.59)  |                        |                                    |       |

**Schizophrenia Risk Allele='G'=major allele**

Positive Regression co-efficient indicates Sz risk allele associated with worse performance on cognitive test

**Table S5. rs13219354 association with cognitive measures**

**MHC-rs13219354**

| Cognitive function         | Test or Subscale      | sample   | n    | Mean (SD)    |              |              | Regression Coefficient | 95% CI of B regression coefficient | p     |
|----------------------------|-----------------------|----------|------|--------------|--------------|--------------|------------------------|------------------------------------|-------|
|                            |                       |          |      | CC           | CT           | TT           |                        |                                    |       |
| <b>Current IQ</b>          | Full Scale IQ         | cases    | 336  | 97.5 (6.4)   | 100.5 (18.0) | 99.5 (18.3)  | 0.968                  | (-)0.312-2.248                     | 0.138 |
|                            |                       | controls | 2234 | 115.0 (15.0) | 114.1 (14.0) | 113.1 (14.5) |                        |                                    |       |
| <b>Working Memory</b>      | WAIS Digit Span       | cases    | 336  | 16.0 (0.0)   | 13.2 (3.6)   | 13.7 (3.7)   | 0.033                  | (-)0.299-0.364                     | 0.847 |
|                            |                       | controls | 2234 | 14.8 (3.9)   | 14.3 (3.8)   | 14.3 (3.9)   |                        |                                    |       |
|                            | WMS Spatial Span      | cases    | 235  | -            | 15.3 (3.4)   | 15.1 (3.3)   | 0.2                    | (-)0.349-0.749                     | 0.474 |
|                            |                       | controls | 398  | 17.9 (4.4)   | 17.3 (3.3)   | 17.2 (3.4)   |                        |                                    |       |
| <b>Episodic Memory</b>     | WMS Logical Memory I  | cases    | 236  | -            | 23.4 (7.8)   | 24.6 (8.9)   | (-)0.275               | (-)1.513-0.963                     | 0.663 |
|                            |                       | controls | 399  | 32.6 (6.0)   | 30.3 (6.9)   | 30.8 (6.6)   |                        |                                    |       |
|                            | WMS Logical Memory II | cases    | 236  | -            | 26.9 (10.2)  | 26.8 (10.9)  | 0.525                  | (-)0.886-1.936                     | 0.465 |
|                            |                       | controls | 399  | 37.2 (9.2)   | 34.5 (6.7)   | 34.2 (7.4)   |                        |                                    |       |
| <b>Attention/Vigilance</b> | CPT (3,7 version)     | cases    | 340  | 4.27 (0.11)  | 4.22 (0.82)  | 4.15 (0.94)  | 0.102                  | (-)0.005-0.209                     | 0.063 |
|                            |                       | controls | 516  | 4.98 (0.50)  | 4.83 (0.57)  | 4.73 (0.58)  |                        |                                    |       |

**Schizophrenia Risk Allele='T'=major allele**

Positive Regression co-efficient indicates Sz risk allele associated with worse performance on cognitive test

**Table S6. Results of rs6904071 association with cognitive domains separately in cases and controls in German and Irish samples**

German Sample

| Cognitive function               | Test or Subscale             | Sample   | n    | Mean (SD)    | Mean (SD)    | Mean (SD)    | Regression Coefficient <sup>a</sup> | 95% CI         | p     |
|----------------------------------|------------------------------|----------|------|--------------|--------------|--------------|-------------------------------------|----------------|-------|
|                                  |                              |          |      | AA           | AG           | GG           |                                     |                |       |
| <i>General Cognitive Ability</i> | Full Scale IQ                | cases    | 342  | 106.5 (17.8) | 100.8 (17.7) | 99.3 (18.5)  | 2.434                               | (-1.215-6.083) | 0.190 |
|                                  |                              | controls | 2244 | 114.5 (13.9) | 113.8 (14.5) | 113.0 (14.5) | 0.863                               | (-)0.206-1.931 | 0.113 |
| <i>Verbal Working Memory</i>     | WAIS Digit Span              | cases    | 342  | 16.4 (4.6)   | 14.0 (3.5)   | 13.3 (3.7)   | 0.989                               | 0.247-1.732    | 0.009 |
|                                  |                              | controls | 2244 | 14.7 (4.0)   | 14.3 (3.9)   | 14.2 (3.8)   | 0.138                               | (-)0.150-0.426 | 0.348 |
| <i>Spatial Working Memory</i>    | WMS Spatial Span             | cases    | 239  | 18.5 (3.73)  | 15.3 (2.98)  | 14.91 (3.40) | 0.872                               | 0.099-1.644    | 0.027 |
|                                  |                              | controls | 399  | 17.8 (3.79)  | 17.3 (3.11)  | 17.11 (3.43) | 0.254                               | (-)0.364-0.804 | 0.364 |
| <i>Immediate Episodic Memory</i> | WMS Logical Memory Immediate | cases    | 240  | 29.2 (8.6)   | 24.8 (8.2)   | 23.9 (9.0)   | 1.308                               | (-)0.771-3.387 | 0.216 |
|                                  |                              | controls | 400  | 31.6 (7.4)   | 30.6 (6.5)   | 30.7 (6.6)   | 0.171                               | (-)0.922-1.264 | 0.758 |
| <i>Delayed Episodic Memory</i>   | WMS Logical Memory Delayed   | cases    | 239  | 30.0(11.5)   | 28.8 (9.4)   | 25.8 (10.5)  | 2.544                               | 0.133-4.954    | 0.039 |
|                                  |                              | controls | 400  | 36.7 (9.1)   | 34.7 (6.6)   | 34.1 (7.4)   | 0.966                               | (-)0.236-0.217 | 0.115 |
| <i>Attention/Vigilance</i>       | CPT (3-7 version)            | cases    | 346  | 4.59 (0.67)  | 4.28 (0.83)  | 4.10 (0.95)  | 0.210                               | 0.027-0.393    | 0.024 |
|                                  |                              | controls | 517  | 4.90 (0.49)  | 4.85 (0.56)  | 4.71 (0.58)  | 0.116                               | 0.031-0.201    | 0.007 |

Irish Sample

| Cognitive function               | Test or Subscale           | Sample   | n   | Mean (SD)    | Mean (SD)    | Mean (SD)    | Regression Coefficient <sup>a</sup> | 95% CI          | p     |
|----------------------------------|----------------------------|----------|-----|--------------|--------------|--------------|-------------------------------------|-----------------|-------|
|                                  |                            |          |     | AA           | AG           | GG           |                                     |                 |       |
| <i>General Cognitive Ability</i> | Abbreviated Full Scale IQ  | cases    | 300 | 92.5 (19.3)  | 91.5 (18.0)  | 90.5 (18.1)  | 1.213                               | (-)0.2870-5.295 | 0.559 |
|                                  |                            | controls | 148 | 131.0 (11.5) | 121.5 (14.9) | 121.8 (14.6) | 1.636                               | (-)0.2485-5.756 | 0.434 |
| <i>Spatial Working Memory</i>    | CANTAB Spatial WM          | cases    | 365 | -1.08 (0.92) | -0.97 (1.29) | -0.96 (1.34) | 0.029                               | (-)0.289-0.230  | 0.824 |
|                                  |                            | controls | 140 | 0.26 (0.83)  | 0.26 (0.75)  | 0.17 (0.84)  | 0.079                               | (-)0.153-0.310  | 0.503 |
| <i>Delayed Episodic Memory</i>   | WMS Logical Memory Delayed | cases    | 377 | 6.5 (3.3)    | 7.7 (3.2)    | 7.0 (3.3)    | 0.427                               | (-)0.207-1.062  | 0.187 |
|                                  |                            | controls | 145 | 16.2 (1.6)   | 13.4 (2.5)   | 13.0 (2.6)   | 0.837                               | 0.118-1.556     | 0.023 |
| <i>Attention/Vigilance</i>       | CPT –IP (3 letters)        | cases    | 257 | 2.27 (1.50)  | 1.97 (0.87)  | 1.95 (1.04)  | 0.031                               | (-)0.209-0.271  | 0.799 |
|                                  |                            | controls | n/a | n/a          | n/a          | n/a          | n/a                                 | n/a             | n/a   |

Table S7. Results of rs6904071 association with cognitive domains adjusted for delayed episodic memory in combined sample

| Cognitive function               | Participant Numbers                     | Unadjusted Analysis Combined Cases and Controls |       | Adjusted for Delayed Episodic Analysis Combined Cases and Controls |       |
|----------------------------------|-----------------------------------------|-------------------------------------------------|-------|--------------------------------------------------------------------|-------|
|                                  |                                         | B                                               | p     | B                                                                  | p     |
| <i>General Cognitive Ability</i> | <i>Controls 544</i><br><i>Cases 537</i> | 0.13                                            | 0.012 | 0.019                                                              | 0.674 |
| <i>Verbal Working Memory</i>     | <i>Controls 542</i><br><i>Cases 600</i> | 0.117                                           | 0.021 | 0.05                                                               | 0.289 |
| <i>Spatial Working Memory</i>    | <i>Controls 537</i><br><i>Cases 598</i> | NS                                              |       | NS                                                                 |       |
| <i>Immediate Episodic Memory</i> | <i>Controls 545</i><br><i>Cases 616</i> | 0.098                                           | 0.036 | 0.038                                                              | 0.067 |
| <i>Attention/Vigilance</i>       | <i>Controls 389</i><br><i>Cases 488</i> | 0.143                                           | 0.012 | 0.08                                                               | 0.136 |

NS - Non-significant

See text and main tables for details of cognitive tests used for each domain

| <b>Table S8.</b> Demographic and Clinical details by rs6904071 genotype in German and Irish samples |                               |                  |                   |                                    |                 |                              |                   |                    |                                    |          |
|-----------------------------------------------------------------------------------------------------|-------------------------------|------------------|-------------------|------------------------------------|-----------------|------------------------------|-------------------|--------------------|------------------------------------|----------|
| <b>German Sample</b>                                                                                | <b>Cases</b>                  |                  |                   |                                    |                 | <b>Controls</b>              |                   |                    |                                    |          |
|                                                                                                     | <b>AA (n=10)</b>              | <b>AG (n=93)</b> | <b>GG (n=236)</b> | <b>F value/<math>\chi^2</math></b> | <b>p</b>        | <b>AA (n=83)</b>             | <b>AG (n=636)</b> | <b>GG (n=1528)</b> | <b>F value/<math>\chi^2</math></b> | <b>p</b> |
| Age (s.d.)                                                                                          | 38.3 (12.2)                   | 37.3 (10.8)      | 39.4 (11.2)       | 1.17                               | 0.313           | 51.1 (16.3)                  | 51.7 (15.7)       | 51.6 (15.6)        | 0.053                              | 0.95     |
| Gender (% female)                                                                                   | 60                            | 40.2             | 38.6              | 1.85                               | 0.4             | 55.4                         | 52.2              | 50.9               | 0.89                               | 0.64     |
| Education (% completing high school)                                                                | 60                            | 68               | 63.7              | 6.5                                | 0.593           | 79.5                         | 74.2              | 74.9               | 1.6                                | 0.809    |
| Medication mg (s.d.)                                                                                | 442.2 (396.1)                 | 914.1 (1008.3)   | 944.4 (1273.3)    | 0.924                              | 0.398           |                              |                   |                    |                                    |          |
| <b>Irish Sample*</b>                                                                                | <b>Cases</b>                  |                  |                   |                                    | <b>Controls</b> |                              |                   |                    |                                    |          |
|                                                                                                     | <b>AA/AG genotype (n=117)</b> |                  | <b>GG (n=263)</b> | <b>F value/<math>\chi^2</math></b> | <b>p</b>        | <b>AA/AG genotype (n=62)</b> |                   | <b>GG (n=86)</b>   | <b>F value/<math>\chi^2</math></b> | <b>p</b> |
| Age (s.d.)                                                                                          | 40.0 (11.6)                   |                  | 41.2 (12.0)       | 0.755                              | 0.386           | 37.3 (13.2)                  |                   | 36.6 (12.8)        | 0.038                              | 0.96     |
| Gender (% female)                                                                                   | 23.0                          |                  | 29.4              | 1.74                               | 0.19            | 50.0                         |                   | 47.7               | 0.08                               | 0.78     |
| Education (Years)                                                                                   | 13.0 (2.4)                    |                  | 13.0 (2.4)        | 0.002                              | 0.97            | 16.2 (2.1)                   |                   | 16.0 (2.4)         | 3.6                                | 0.06     |
| Medication mg (s.d.)                                                                                | 518 (549.3)                   |                  | 619(616)          | 2.6                                | 0.1             |                              |                   |                    |                                    |          |

\* In the Irish sample AA and AG genotypes were combined for this analysis given small sample sizes in controls - examining genotype groups separately did not alter the results which all remained non-significant



| Table S9. Principal Component Analysis of rs6904071 with Cognitive Phenotypes |                        |                             |        |                        |       |                        |       |                        |       |
|-------------------------------------------------------------------------------|------------------------|-----------------------------|--------|------------------------|-------|------------------------|-------|------------------------|-------|
| Cognitive Domain                                                              | Test                   | No Principal Component (PC) |        | First PC               |       | 2 PCs                  |       | 3 PCs                  |       |
|                                                                               |                        | Regression Coefficient      | p      | Regression Coefficient | p     | Regression Coefficient | p     | Regression Coefficient | p     |
| Episodic Memory                                                               | Logical Memory Delayed | 0.9077                      | 0.1634 | 0.929                  | 0.152 | 0.93                   | 0.152 | 0.9434                 | 0.146 |
| General Cognition                                                             | Full Scale IQ          | 1.285                       | 0.214  | 1.362                  | 0.186 | 1.373                  | 0.182 | 1.383                  | 0.179 |
| Attention/Vigilance                                                           | CPT 3-7 version        | 0.153                       | 0.004  | 0.153                  | 0.004 | 0.153                  | 0.004 | 0.152                  | 0.004 |
